# Supplementary material for: Confirmatory factor analysis of the Patient Assessment of Constipation-Symptoms (PAC-SYM) among patients with chronic constipation
Source: Springer Nature journal article supplement (doi:10.1007/s11136-014-0886-2), 2014-12-19
Supplement: MOESM1 [file 283684]

**Appendix 1.**

**Factor loadings across competing models of the PAC-SYM factor structure.**

**Panel 1. Single-Factor Model**

**
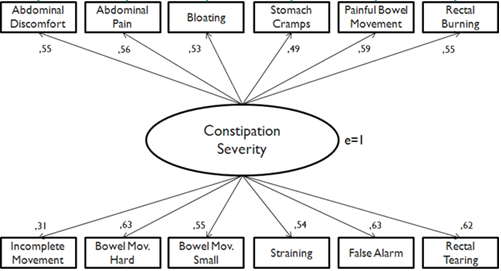
**

**Panel 2. Uncorrelated 3-factor Model**

**
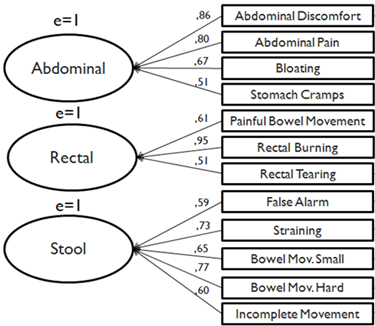
**

**Panel 3. Correlated 3-factor Model**

**
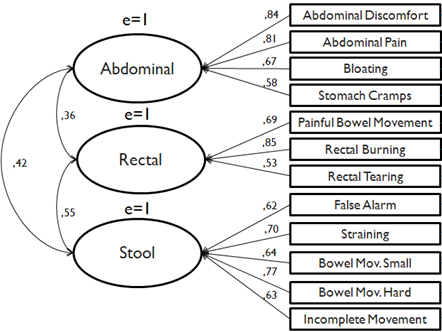
**

**Panel 4. Second-Order factor, and 3 first-order factors**

**
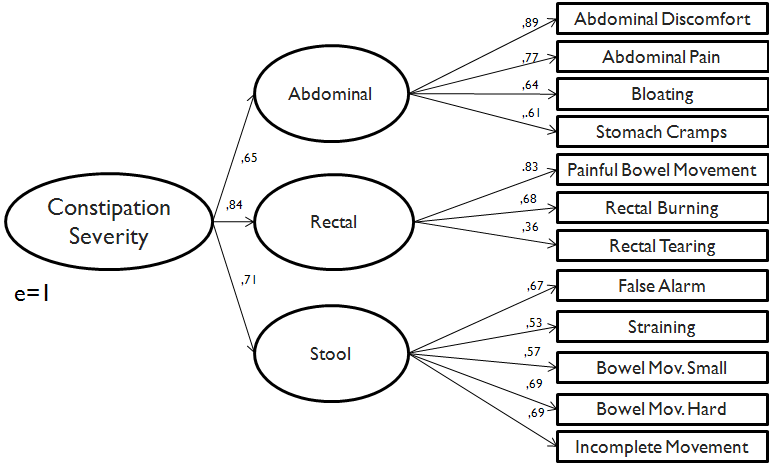
**
